# Supplementary material for: Stable Ln-MOFs as multi-responsive photoluminescence sensors for the sensitive sensing of Fe3+, Cr2O72−, and nitrofuran
Source: Royal Society of Chemistry journal article supplement (doi:10.1039/c9ce01995b), 2020-01-01
Supplement: c9ce01995b1.pdf [file c9ce01995b1.pdf]

## Supporting Information

### Stable Ln-MOFs as multi-responsive photoluminescence sensors for sensitively sensing $\text{Fe}^{3+}$ , $\text{Cr}_2\text{O}_7^{2-}$ , and nitrofurant

Lijuan Duan,<sup>a#</sup> Chengcheng Zhang,<sup>a#</sup> Peipei Cen,<sup>b</sup> Xiaoyong Jin,<sup>a\*</sup> Chen Liang,<sup>a</sup> Jinhui Yang<sup>a</sup> and Xiangyu Liu<sup>a\*</sup>

<sup>a</sup> State Key Laboratory of High-efficiency Utilization of Coal and Green Chemical Engineering, National Demonstration Center for Experimental Chemistry Education, College of Chemistry and Chemical Engineering, Ningxia University, Yinchuan 750021, China

<sup>b</sup> College of Public Health and Management, Ningxia Medical University, Yinchuan 750021, China

# These authors contributed equally to this work

**\*Corresponding author**

**Dr. Xiangyu Liu**

**Tel.: +86-951-2062004**

**Fax: +86-951-2062860**

**E-mail: xiangyuliu432@126.com**

**\*Corresponding author**

**Dr. Xiaoyong Jin**

**E-mail: jinxy588@163.com**

## Contents

**Fig. S1** IR spectra of **1-2** (a), **3-6** (b).

**Fig. S2** PXRD patterns of **1** (a), **2** (b).

**Fig. S3** PXRD patterns of **1-6**.

**Fig. S4** TG curves for **1-2** (a), **3-6** (b).

**Fig. S5** Solid-state fluorescence spectra of H<sub>2</sub>pta.

**Fig. S6** The excitation and emission spectra of **1** (a), **3** (b). (Inset image under 254 nm UV-radiation of **1** and **3**).

**Fig. S7** Simplified schematic diagrams showing energy transfer (ET) process from ligand to Eu<sup>3+</sup> or Tb<sup>3+</sup> ions.

**Fig. S8** UV-vis adsorption spectra of Fe<sup>3+</sup>, Cr<sub>2</sub>O<sub>7</sub><sup>2-</sup> aqueous solution and NIF in DMF solution.

**Table S1.** Selected Bond Lengths (Å) and Bond Angles (°) for **1-6**.

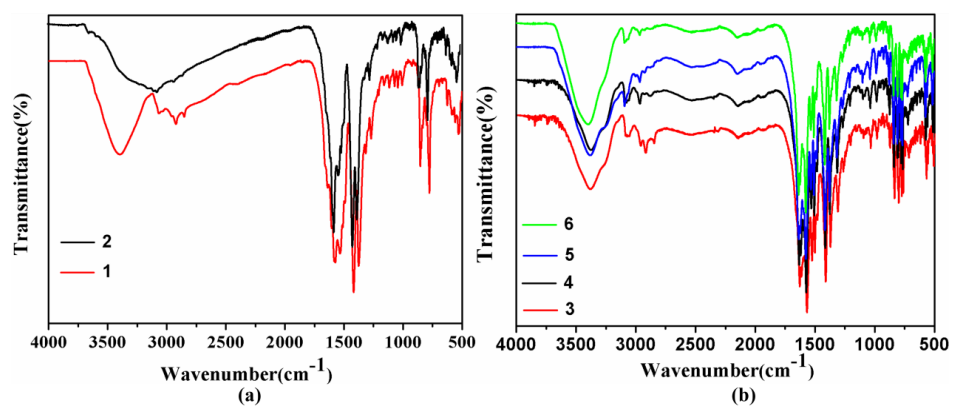

Fig. S1 IR spectra of 1-2 (a), 3-6 (b).

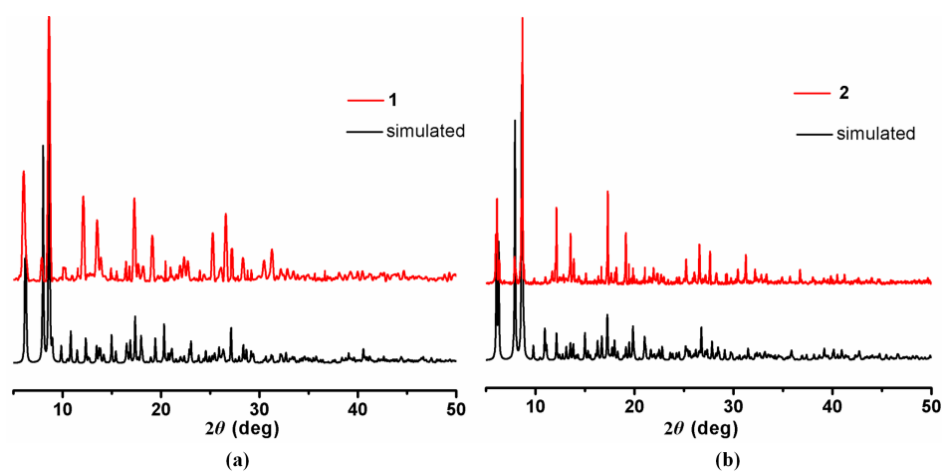

Fig. S2 PXRD patterns of 1 (a), 2 (b).

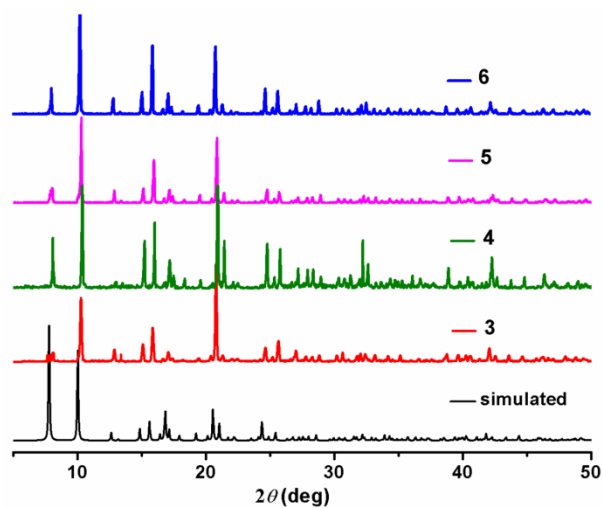

Fig. S3 PXRD patterns of 1-6.

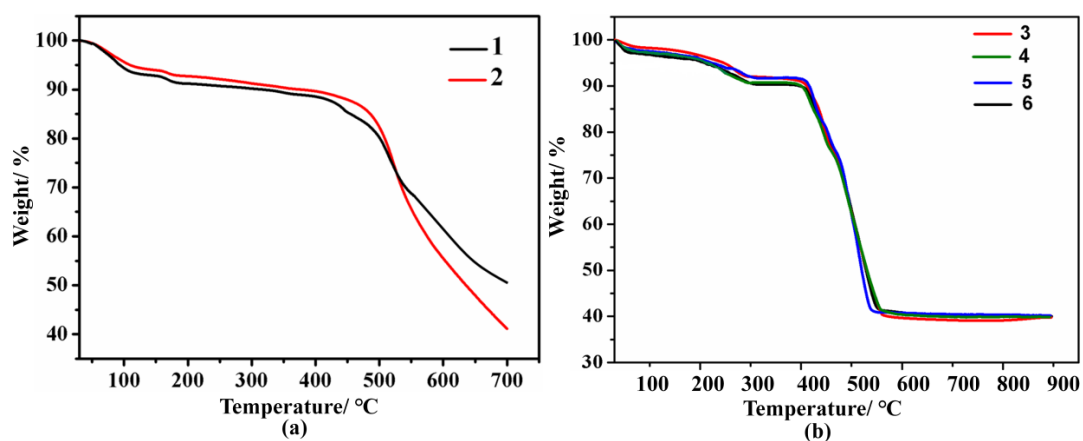

Fig. S4 TG curves for 1-2 (a), 3-6 (b).

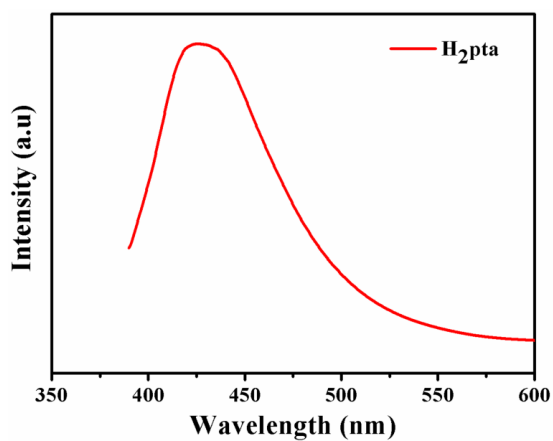

Fig. S5 Solid-state fluorescence spectra of H<sub>2</sub>pta.

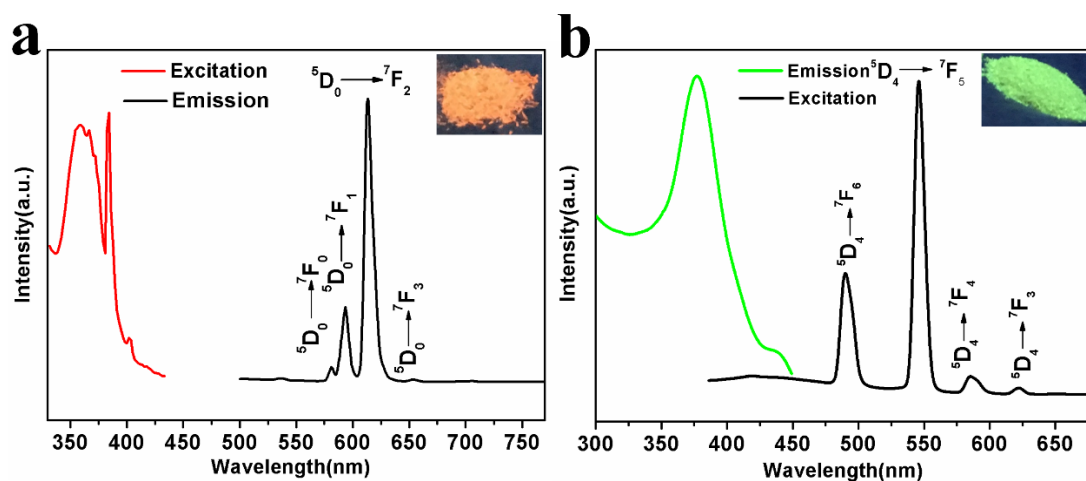

Fig. S6 The excitation and emission spectra of 1 (a), 3 (b). (Inset image under 254 nm UV-radiation of 1 and 3).

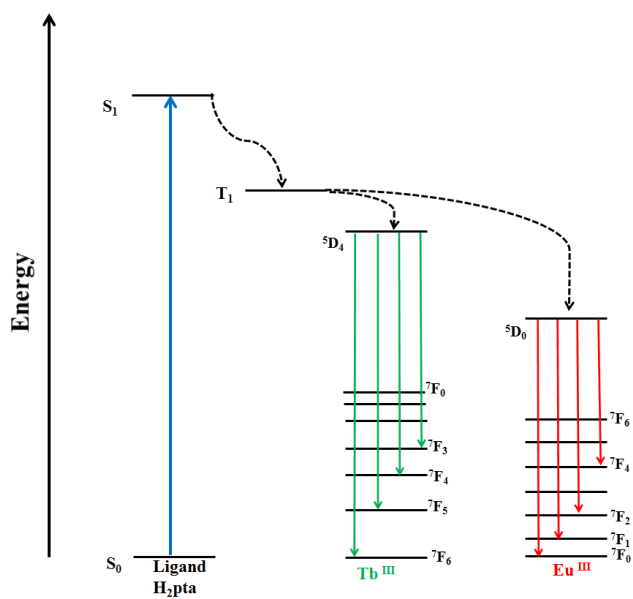

Fig. S7 Simplified schematic diagrams showing energy transfer (ET) process from ligand to Eu<sup>3+</sup> or Tb<sup>3+</sup> ions.

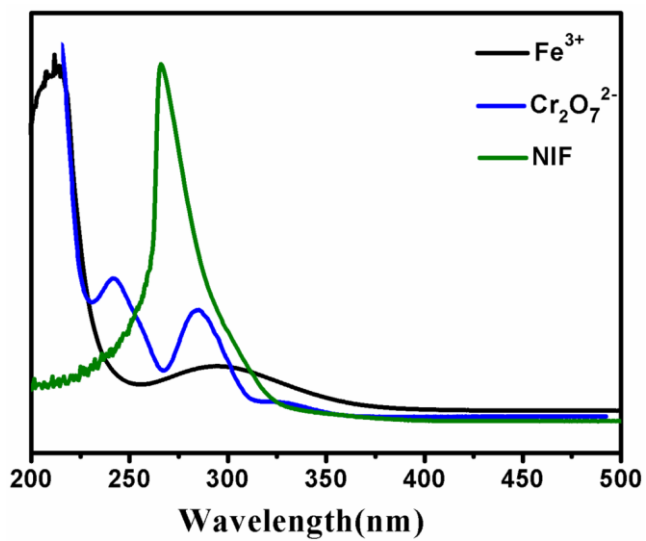

Fig. S8. UV-vis adsorption spectra of Fe<sup>3+</sup>, Cr<sub>2</sub>O<sub>7</sub><sup>2-</sup> aqueous solution and NIF in DMF solution.

**Table S1.** Selected bond lengths (Å) and bond angles (°) for **1-6**.

| Compound 1            |            |                      |            |
|-----------------------|------------|----------------------|------------|
| Eu(1)-Eu(1)#1         | 4.1012(9)  | Eu(1)-O(5)           | 2.368(5)   |
| Eu(1)-O(1)#2          | 2.476(5)   | Eu(1)-O(7)           | 2.440(5)   |
| Eu(1)-O(2)#2          | 2.379(6)   | Eu(1)-O(11)          | 2.344(5)   |
| Eu(1)-O(3)#1          | 2.574(5)   | Eu(1)-O(12)#1        | 2.380(6)   |
| Eu(1)-O(3)            | 2.485(5)   | O(2)-Eu(1)#2         | 2.379(6)   |
| Eu(1)-O(4)#1          | 2.630(5)   | O(3)-Eu(1)#1         | 2.574(5)   |
| Eu(2)-Eu(1)#3         | 4.1870(7)  | Eu(2)-O(8)#3         | 2.507(6)   |
| Eu(2)-O(1W)           | 2.407(8)   | Eu(2)-O(9)#5         | 2.369(6)   |
| Eu(2)-O(2W)           | 2.424(6)   | Eu(2)-O(10)#5        | 2.496(5)   |
| Eu(2)-O(4)#4          | 2.441(5)   | Eu(2)-O(13)          | 2.335(6)   |
| Eu(2)-O(6)#3          | 2.393(6)   | O(4)-Eu(1)#1         | 2.630(5)   |
| Eu(2)-O(7)#3          | 2.661(5)   | O(4)-Eu(2)#6         | 2.441(5)   |
| O(1)-Eu(1)#2          | 2.476(5)   | O(6)-Eu(2)#3         | 2.393(6)   |
| O(10)-Eu(2)#5         | 2.496(5)   | O(7)-Eu(2)#3         | 2.661(5)   |
| O(12)-Eu(1)#1         | 2.380(5)   | O(8)-Eu(2)#3         | 2.507(6)   |
| C(34)-Eu(2)#5         | 2.803(8)   | O(9)-Eu(2)#5         | 2.369(6)   |
| O(1)#1-Eu(1)-Eu(1)#2  | 112.26(13) | O(1)#1-Eu(1)-O(4)#2  | 137.00(18) |
| O(1)#1-Eu(1)-O(3)     | 78.74(18)  | O(2)#1-Eu(1)-Eu(1)#2 | 125.90(16) |
| O(1)#1-Eu(1)-O(3)#2   | 142.35(17) | O(2)#1-Eu(1)-O(1)#1  | 53.3(2)    |
| O(2)#1-Eu(1)-O(4)#2   | 147.6(2)   | O(2)#1-Eu(1)-O(3)#2  | 149.6(2)   |
| O(2)#1-Eu(1)-O(7)     | 91.4(2)    | O(2)#1-Eu(1)-O(3)    | 94.3(2)    |
| O(2)#1-Eu(1)-O(12)#2  | 80.6(2)    | O(5)-Eu(1)-O(7)      | 71.9(2)    |
| O(3)#2-Eu(1)-O(4)#2   | 48.96(16)  | O(5)-Eu(1)-O(12)#2   | 72.7(2)    |
| O(3)-Eu(1)-O(4)#2     | 117.06(17) | O(11)-Eu(1)-Eu(1)#2  | 67.42(14)  |
| O(5)-Eu(1)-O(3)       | 144.9(2)   | O(11)-Eu(1)-O(1)#1   | 77.22(19)  |
| O(5)-Eu(1)-O(3)#2     | 98.7(2)    | O(11)-Eu(1)-O(2)#1   | 130.5(2)   |
| O(5)-Eu(1)-O(4)#2     | 72.4(2)    | O(11)-Eu(1)-O(3)#2   | 71.84(18)  |
| O(12)#2-Eu(1)-Eu(1)#2 | 66.18(13)  | O(3)#2-Eu(1)-Eu(1)#2 | 35.12(11)  |
| O(12)#2-Eu(1)-O(1)#1  | 122.68(19) | O(3)-Eu(1)-Eu(1)#2   | 36.58(12)  |
| O(12)#2-Eu(1)-O(3)    | 72.25(17)  | O(3)-Eu(1)-O(3)#2    | 71.70(17)  |
| O(12)#2-Eu(1)-O(3)#2  | 69.56(18)  | O(4)#2-Eu(1)-Eu(1)#2 | 82.16(12)  |
| O(12)#2-Eu(1)-O(4)#2  | 100.30(18) | O(5)-Eu(1)-Eu(1)#2   | 126.16(17) |
| O(1W)-Eu(2)-Eu(1)#3   | 140.1(2)   | O(5)-Eu(1)-O(1)#1    | 118.8(2)   |
| O(1W)-Eu(2)-O(2W)     | 144.6(3)   | O(5)-Eu(1)-O(2)#1    | 77.1(2)    |
| O(1W)-Eu(2)-O(4)#4    | 140.3(2)   | O(5)-Eu(1)-C(21)#1   | 97.9(2)    |
| O(1W)-Eu(2)-O(7)#3    | 125.5(3)   | O(7)-Eu(1)-Eu(1)#2   | 139.60(13) |
| O(1W)-Eu(2)-O(8)#3    | 80.7(3)    | O(7)-Eu(1)-O(1)#1    | 75.66(18)  |
| O(1W)-Eu(2)-O(10)#5   | 73.8(3)    | O(7)-Eu(1)-O(3)      | 143.04(17) |
| O(2W)-Eu(2)-O(10)#5   | 119.6(2)   | O(7)-Eu(1)-O(3)#2    | 116.23(16) |
| O(4)#4-Eu(2)-Eu(1)#3  | 35.81(12)  | O(7)-Eu(1)-O(4)#2    | 69.01(17)  |
| O(4)#4-Eu(2)-O(7)#3   | 68.47(17)  | O(11)-Eu(1)-O(3)     | 71.90(18)  |

|                      |            |                       |            |
|----------------------|------------|-----------------------|------------|
| O(4)#4-Eu(2)-O(8)#3  | 117.58(19) | O(11)-Eu(1)-O(4)#2    | 71.57(17)  |
| O(4)#4-Eu(2)-O(10)#5 | 75.67(18)  | O(11)-Eu(1)-O(5)      | 138.6(2)   |
| O(7)#3-Eu(2)-Eu(1)#3 | 33.15(11)  | O(11)-Eu(1)-O(7)      | 76.73(19)  |
| O(8)#3-Eu(2)-O(7)#3  | 50.04(19)  | O(11)-Eu(1)-O(12)#2   | 133.57(19) |
| O(8)#3-Eu(2)-Eu(1)#3 | 81.80(15)  | O(12)#2-Eu(1)-O(7)    | 144.62(18) |
| O(9)#5-Eu(2)-Eu(1)#3 | 121.11(17) | O(2W)-Eu(2)-Eu(1)#3   | 70.78(16)  |
| O(9)#5-Eu(2)-O(1W)#3 | 92.0(3)    | O(2W)-Eu(2)-O(4)#4    | 73.7(2)    |
| O(9)#5-Eu(2)-O(2W)   | 76.5(2)    | O(2W)-Eu(2)-O(7)#3    | 67.7(2)    |
| O(9)#5-Eu(2)-O(4)#4  | 88.8(2)    | O(6)#3-Eu(2)-O(4)#4   | 79.1(2)    |
| O(13)-Eu(2)-Eu(1)#3  | 133.19(17) | O(6)#3-Eu(2)-O(7)#3   | 71.31(19)  |
| O(13)-Eu(2)-O(1W)    | 73.0(3)    | O(6)#3-Eu(2)-O(8)#3   | 73.0(2)    |
| O(13)-Eu(2)-O(2W)    | 71.8(2)    | O(6)#3-Eu(2)-O(10)#5  | 84.2(2)    |
| O(13)-Eu(2)-O(8)#3   | 71.5(2)    | O(6)#3-Eu(2)-Eu(1)#3  | 67.50(14)  |
| O(13)-Eu(2)-O(9)#5   | 75.0(3)    | O(6)#3-Eu(2)-O(1W)    | 73.1(3)    |
| O(13)-Eu(2)-O(10)#5  | 114.7(2)   | O(6)#3-Eu(2)-O(2W)    | 136.8(2)   |
| O(9)#5-Eu(2)-O(6)#3  | 136.2(2)   | O(2W)-Eu(2)-O(8)#3    | 90.6(3)    |
| O(9)#5-Eu(2)-O(7)#3  | 141.6(2)   | O(10)#5-Eu(2)-Eu(1)#3 | 107.79(14) |
| O(9)#5-Eu(2)-O(8)#3  | 146.4(2)   | O(10)#5-Eu(2)-O(7)#3  | 139.48(18) |
| O(9)#5-Eu(2)-O(10)#5 | 52.0(2)    | O(10)#5-Eu(2)-O(8)#3  | 149.8(2)   |
| O(13)-Eu(2)-O(4)#4   | 144.4(2)   | O(13)-Eu(2)-O(6)#3    | 133.9(2)   |

#1 2-x,-y,1-z; #2 1-x,-y,1-z; #3 2-x,1-y,1-z; #4 +x,1+y,+z; #5 1-x,1-y,1-z; #6 +x,-1+y,+z; #7 2-x,-y,2-z

| Compound 2            |          |                      |          |
|-----------------------|----------|----------------------|----------|
| Gd(1)-O(7)            | 2.346(8) | O(2)-Gd(1)-O(6)      | 77.3(3)  |
| Gd(1)-O(2)            | 2.380(8) | O(12)#1-Gd(1)-O(6)   | 138.3(3) |
| Gd(1)-O(12)#1         | 2.382(7) | Gd(2)-O(9)           | 2.352(7) |
| Gd(1)-O(6)            | 2.410(8) | Gd(2)-O(11)          | 2.364(7) |
| Gd(1)-O(5)            | 2.442(8) | Gd(2)-O(10)#4        | 2.368(8) |
| Gd(1)-O(15)#2         | 2.442(8) | Gd(2)-O(14)          | 2.397(7) |
| Gd(1)-O(3)#3          | 2.506(7) | Gd(2)-O(4)#2         | 2.416(7) |
| Gd(1)-O(1)            | 2.557(7) | Gd(2)-O(13)          | 2.435(8) |
| Gd(1)-O(4)#3          | 2.613(7) | Gd(2)-O(16)#5        | 2.445(7) |
| Gd(2)-O(16)#3         | 2.579(7) | O(7)-Gd(1)-O(5)      | 73.5(3)  |
| Gd(2)-O(15)#3         | 2.595(7) | O(2)-Gd(1)-O(5)      | 89.4(3)  |
| O(12)#1-Gd(1)-O(5)    | 72.2(3)  | O(6)-Gd(1)-O(15)#2   | 73.0(3)  |
| O(6)-Gd(1)-O(5)       | 146.1(3) | O(5)-Gd(1)-O(15)#2   | 138.8(3) |
| O(7)-Gd(1)-O(15)#2    | 144.5(3) | O(7)-Gd(1)-O(3)#3    | 71.5(3)  |
| O(2)-Gd(1)-O(15)#2    | 89.5(3)  | O(2)-Gd(1)-O(3)#3    | 145.5(3) |
| O(12)#1-Gd(1)-O(15)#2 | 78.9(3)  | O(12)#1-Gd(1)-O(3)#3 | 76.1(3)  |
| O(6)-Gd(1)-O(3)#3     | 90.6(3)  | O(12)#1-Gd(1)-O(4)#3 | 72.4(3)  |
| O(5)-Gd(1)-O(3)#3     | 82.9(3)  | O(6)-Gd(1)-O(4)#3    | 68.8(3)  |
| O(15)#2-Gd(1)-O(3)#3  | 117.9(2) | O(5)-Gd(1)-O(4)#3    | 126.7(3) |
| O(7)-Gd(1)-O(1)       | 114.8(3) | O(15)#2-Gd(1)-O(4)#3 | 67.9(2)  |
| O(2)-Gd(1)-O(1)       | 52.6(3)  | O(3)#3-Gd(1)-O(4)#3  | 50.6(2)  |

|                                                                                                          |          |                       |          |
|----------------------------------------------------------------------------------------------------------|----------|-----------------------|----------|
| O(12)#1-Gd(1)-O(1)                                                                                       | 80.5(3)  | O(1)-Gd(1)-O(4)#3     | 137.5(2) |
| O(6)-Gd(1)-O(1)                                                                                          | 119.8(3) | O(14)-Gd(2)-O(4)#2    | 94.7(3)  |
| O(5)-Gd(1)-O(1)                                                                                          | 71.6(3)  | O(9)-Gd(2)-O(13)      | 76.6(3)  |
| O(15)#2-Gd(1)-O(1)                                                                                       | 75.2(2)  | O(11)-Gd(2)-O(13)     | 118.3(3) |
| O(3)#3-Gd(1)-O(1)                                                                                        | 149.6(3) | O(9)-Gd(2)-O(11)      | 139.6(3) |
| O(7)-Gd(1)-O(4)#3                                                                                        | 107.5(3) | O(9)-Gd(2)-O(10)#4    | 133.9(3) |
| O(2)-Gd(1)-O(4)#3                                                                                        | 143.3(3) | O(11)-Gd(2)-O(10)#4   | 72.6(3)  |
| O(11)-Gd(2)-O(4)#2                                                                                       | 71.3(3)  | O(10)#4-Gd(2)-O(13)   | 122.5(3) |
| O(16)#5-Gd(2)-O(15)#3                                                                                    | 117.3(2) | O(14)-Gd(2)-O(13)     | 53.7(3)  |
| O(16)#3-Gd(2)-O(15)#3                                                                                    | 50.2(2)  | O(4)#2-Gd(2)-O(13)    | 76.4(3)  |
| O(10)#4-Gd(2)-O(4)#2                                                                                     | 143.9(3) | O(9)-Gd(2)-O(16)#5    | 71.2(3)  |
| O(9)-Gd(2)-O(14)                                                                                         | 129.9(3) | O(11)-Gd(2)-O(16)#5   | 145.4(3) |
| O(11)-Gd(2)-O(14)                                                                                        | 78.2(3)  | O(10)#4-Gd(2)-O(16)#5 | 73.1(3)  |
| O(10)#4-Gd(2)-O(14)                                                                                      | 78.2(3)  | O(14)-Gd(2)-O(16)#5   | 90.9(3)  |
| O(9)-Gd(2)-O(4)#2                                                                                        | 77.3(3)  | O(4)#2-Gd(2)-O(16)#5  | 142.9(3) |
| O(9)-Gd(2)-O(16)#3                                                                                       | 72.4(2)  | O(13)-Gd(2)-O(16)#5   | 77.7(2)  |
| O(11)-Gd(2)-O(16)#3                                                                                      | 100.0(3) | O(13)-Gd(2)-O(16)#3   | 141.6(2) |
| O(10)#4-Gd(2)-O(16)#3                                                                                    | 69.1(3)  | O(16)#5-Gd(2)-O(16)#3 | 71.2(3)  |
| O(14)-Gd(2)-O(16)#3                                                                                      | 146.0(3) | O(9)-Gd(2)-O(15)#3    | 71.9(3)  |
| O(4)#2-Gd(2)-O(16)#3                                                                                     | 117.1(2) | O(11)-Gd(2)-O(15)#3   | 73.4(3)  |
| O(14)-Gd(2)-O(15)#3                                                                                      | 150.4(3) | O(10)#4-Gd(2)-O(15)#3 | 100.6(3) |
| O(4)#2-Gd(2)-O(15)#3                                                                                     | 68.6(2)  | O(13)-Gd(2)-O(15)#3   | 136.9(3) |
| #1 2-x,-y,1-z; #2 1-x,-y,1-z; #3 2-x,1-y,1-z; #4 +x,1+y,+z; #5 1-x,1-y,1-z; #6 +x,-1+y,+z; #7 2-x,-y,2-z |          |                       |          |

---

**Compound 3**

---

|                     |            |                     |            |
|---------------------|------------|---------------------|------------|
| Tb(1)-O(7)#1        | 2.402(4)   | Tb(1)-O(7)#1        | 2.771(7)   |
| Tb(1)-O(1)          | 2.291(5)   | O(7)-Tb(1)#4        | 2.402(4)   |
| Tb(1)-O(6)#1        | 2.404(4)   | O(6)-Tb(1)#4        | 2.404(4)   |
| Tb(1)-O(8)          | 2.374(5)   | O(3)-Tb(1)#2        | 2.455(5)   |
| Tb(1)-O(3)#2        | 2.455(5)   | O(2)-Tb(1)#3        | 2.348(4)   |
| Tb(1)-O(5)          | 2.401(4)   | O(4)-Tb(1)#2        | 2.391(5)   |
| Tb(1)-O(2)#3        | 2.348(4)   | C(13)-Tb(1)#2       | 2.771(7)   |
| O(6)#1-Tb(1)-O(3)#2 | 75.99(17)  | O(5)-Tb(1)-O(6)#1   | 134.84(16) |
| O(4)#2-Tb(1)-O(6)#1 | 89.33(18)  | O(5)-Tb(1)-O(3)#2   | 121.95(16) |
| O(7)#1-Tb(1)-O(7)#1 | 67.54(15)  | O(2)#3-Tb(1)-O(7)#1 | 76.87(16)  |
| O(7)#1-Tb(1)-O(1)   | 73.19(16)  | O(2)#3-Tb(1)-O(6)#1 | 106.07(17) |
| O(7)#1-Tb(1)-O(6)#1 | 100.15(19) | O(2)#3-Tb(1)-O(8)   | 79.78(16)  |
| O(1)-Tb(1)-O(8)     | 86.20(16)  | O(2)#3-Tb(1)-O(3)#2 | 146.48(16) |
| O(1)-Tb(1)-O(3)#2   | 147.06(15) | O(2)#3-Tb(1)-O(5)   | 81.01(17)  |
| O(1)-Tb(1)-O(5)     | 142.55(15) | O(2)#3-Tb(1)-O(4)#2 | 156.52(18) |

---



|                     |            |                     |            |
|---------------------|------------|---------------------|------------|
| O(1)-Tb(1)-O(2)#3   | 77.62(16)  | O(4)#2-Tb(1)-O(3)#2 | 53.75(17)  |
| O(1)-Tb(1)-O(4)#2   | 76.60(16)  | O(4)#2-Tb(1)-O(5)   | 75.59(18)  |
| O(1)-Tb(1)-O(7)#1   | 85.76(15)  | O(5)-Tb(1)-O(7)#1   | 152.87(16) |
| O(4)#2-Tb(1)-O(7)#1 | 126.11(17) | O(8)-Tb(1)-O(3)#2   | 129.76(17) |
| O(8)-Tb(1)-O(7)#1   | 122.99(16) | O(8)-Tb(1)-O(5)     | 67.16(16)  |
| O(8)-Tb(1)-O(6)#1   | 70.39(16)  | O(8)-Tb(1)-O(4)#2   | 89.21(17)  |

#1 +x, 1/2-y, -1/2+z; #2 1-x, 1-y, 1-z; #3 -x, 1-y, 1-z; #4 +x, 1/2-y, 1/2+z

---

**Compound 4**

|                     |            |                     |            |
|---------------------|------------|---------------------|------------|
| Dy(1)-O(1)          | 2.405(4)   | Dy(1)-O(2)          | 2.396(4)   |
| Dy(1)-O(7)#1        | 2.456(4)   | O(7)-Dy(1)#1        | 2.456(4)   |
| Dy(1)-O(8)#1        | 2.388(5)   | O(8)-Dy(1)#1        | 2.388(5)   |
| Dy(1)-O(6)#2        | 2.348(4)   | Dy(1)-O(5)          | 2.283(5)   |
| Dy(1)-O(4)#3        | 2.401(4)   | O(6)-Dy(1)#2        | 2.348(4)   |
| Dy(1)-O(3)#3        | 2.372(4)   | O(4)-Dy(1)#4        | 2.401(4)   |
| O(1)-Dy(1)-O(7)#1   | 76.15(16)  | O(3)-Dy(1)#4        | 2.372(4)   |
| O(8)#1-Dy(1)-O(1)   | 89.14(18)  | O(5)-Dy(1)-O(3)#2   | 142.74(15) |
| O(8)#1-Dy(1)-O(7)#1 | 53.58(16)  | O(5)-Dy(1)-O(2)     | 86.26(16)  |
| O(8)#1-Dy(1)-O(4)#2 | 75.91(17)  | O(4)#2-Dy(1)-O(1)   | 134.70(15) |
| O(8)#1-Dy(1)-O(2)   | 126.02(16) | O(4)#2-Dy(1)-O(7)#1 | 122.02(16) |
| O(6)#3-Dy(1)-O(1)   | 106.14(17) | O(3)#2-Dy(1)-O(1)   | 70.07(15)  |
| O(6)#3-Dy(1)-O(7)#1 | 146.56(16) | O(3)#2-Dy(1)-O(7)#1 | 129.72(16) |
| O(6)#3-Dy(1)-O(8)#1 | 156.60(17) | O(3)#2-Dy(1)-O(8)#1 | 89.31(16)  |
| O(6)#3-Dy(1)-O(4)#2 | 80.77(16)  | O(2)-Dy(1)-O(1)     | 67.63(15)  |
| O(6)#3-Dy(1)-O(3)#2 | 79.77(16)  | O(2)-Dy(1)-O(7)#1   | 73.32(15)  |
| O(6)#3-Dy(1)-O(2)   | 76.90(16)  | O(2)-Dy(1)-O(4)#2   | 152.76(16) |
| O(5)-Dy(1)-O(1)     | 147.19(15) | O(5)-Dy(1)-O(6)#3   | 85.73(16)  |
| O(5)-Dy(1)-O(7)#1   | 77.55(16)  | O(5)-Dy(1)-O(4)#2   | 76.64(15)  |
| O(5)-Dy(1)-O(8)#1   | 90.81(17)  | O(3)#2-Dy(1)-O(4)#2 | 67.29(15)  |

#1 3-x, -y, 2-z; #2 2-x, -y, 2-z; #3 +x, -1/2-y, 1/2+z; #4 +x, -1/2-y, -1/2+z

---

**Compound 5**

|                     |          |                     |          |
|---------------------|----------|---------------------|----------|
| Er(1)-O(6)#1        | 2.371(6) | O(4)#2-Er(1)-O(5)   | 75.0(2)  |
| Er(1)-O(7)#1        | 2.365(6) | O(6)-Er(1)#4        | 2.371(6) |
| Er(1)-O(3)#2        | 2.430(6) | O(7)-Er(1)#4        | 2.365(6) |
| Er(1)-O(1)          | 2.249(6) | O(3)-Er(1)#2        | 2.430(6) |
| Er(1)-O(8)          | 2.346(6) | O(4)-Er(1)#2        | 2.357(6) |
| Er(1)-O(5)          | 2.373(6) | O(2)-Er(1)#3        | 2.308(6) |
| Er(1)-O(4)#2        | 2.357(6) | O(4)#2-Er(1)-O(7)#1 | 126.9(2) |
| Er(1)-O(2)#3        | 2.308(6) | O(4)#2-Er(1)-O(3)#2 | 54.3(2)  |
| O(4)#2-Er(1)-O(6)#1 | 89.3(2)  | O(7)#1-Er(1)-O(6)#1 | 68.4(2)  |
| O(6)#1-Er(1)-O(3)#2 | 76.3(2)  | O(7)#1-Er(1)-O(3)#2 | 73.4(2)  |

|                    |          |                     |          |
|--------------------|----------|---------------------|----------|
| O(6)#1-Er(1)-O(5)  | 134.8(2) | O(7)#1-Er(1)-O(3)   | 152.2(2) |
| O(1)-Er(1)-O(6)#1  | 147.3(2) | O(8)-Er(1)-O(3)#2   | 129.6(2) |
| O(1)-Er(1)-O(7)#1  | 85.7(2)  | O(8)-Er(1)-O(5)     | 67.9(2)  |
| O(1)-Er(1)-O(3)#2  | 77.5(2)  | O(8)-Er(1)-O(4)#2   | 88.7(2)  |
| O(1)-Er(1)-O(8)    | 143.0(2) | O(2)#3-Er(1)-O(6)#1 | 106.3(2) |
| O(1)-Er(1)-O(5)    | 76.3(2)  | O(2)#3-Er(1)-O(7)#1 | 76.3(2)  |
| O(1)-Er(1)-O(4)#2  | 90.9(2)  | O(2)#3-Er(1)-O(3)#2 | 146.1(2) |
| O(1)-Er(1)-O(2)#3  | 85.4(2)  | O(2)#3-Er(1)-O(8)   | 80.3(2)  |
| O(1)-Er(1)-C(13)#2 | 80.7(2)  | O(2)#3-Er(1)-O(5)   | 81.3(2)  |
| O(8)-Er(1)-O(6)#1  | 69.7(2)  | O(2)#3-Er(1)-O(4)#2 | 156.2(2) |
| O(8)-Er(1)-O(7)#1  | 123.0(2) | O(5)-Er(1)-O(3)#2   | 121.6(2) |

#1  $+x, 3/2-y, -1/2+z$ ; #2  $1-x, 1-y, 1-z$ ; #3  $-x, 1-y, 1-z$ ; #4  $+x, 3/2-y, 1/2+z$

---

**Compound 6**

|                     |            |                     |          |
|---------------------|------------|---------------------|----------|
| Ho(1)-O(1)          | 2.271(6)   | O(1)-Ho(1)-O(8)     | 76.7(2)  |
| Ho(1)-O(8)          | 2.384(6)   | O(4)-Ho(1)#1        | 2.438(6) |
| Ho(1)-O(4)#1        | 2.438(6)   | O(7)-Ho(1)#4        | 2.377(6) |
| Ho(1)-O(7)#2        | 2.377(6)   | O(2)-Ho(1)#3        | 2.316(5) |
| Ho(1)-O(5)          | 2.354(6)   | O(6)-Ho(1)#4        | 2.377(6) |
| Ho(1)-O(2)#3        | 2.317(5)   | O(3)-Ho(1)#1        | 2.375(6) |
| Ho(1)-O(6)#2        | 2.377(6)   | O(1)-Ho(1)-O(4)#1   | 77.4(2)  |
| Ho(1)-O(3)#1        | 2.375(6)   | O(6)#2-Ho(1)-O(8)   | 152.6(2) |
| O(1)-Ho(1)-O(7)#2   | 147.29(19) | O(2)#3-Ho(1)-O(4)#1 | 146.2(2) |
| O(1)-Ho(1)-O(5)     | 142.89(19) | O(2)#3-Ho(1)-O(7)#2 | 106.1(2) |
| O(1)-Ho(1)-O(2)#3   | 85.67(19)  | O(2)#3-Ho(1)-O(5)   | 80.2(2)  |
| O(1)-Ho(1)-O(6)#2   | 85.94(19)  | O(2)#3-Ho(1)-O(6)#2 | 76.3(2)  |
| O(1)-Ho(1)-O(3)#1   | 90.6(2)    | O(6)#2-Ho(1)-O(4)#1 | 73.5(2)  |
| O(8)-Ho(1)-O(4)#1   | 121.8(2)   | O(3)#1-Ho(1)-O(8)   | 75.0(2)  |
| O(7)#2-Ho(1)-O(8)   | 134.47(19) | O(3)#1-Ho(1)-O(4)#1 | 54.2(2)  |
| O(7)#2-Ho(1)-O(4)#1 | 76.3(2)    | O(3)#1-Ho(1)-O(7)#2 | 89.6(2)  |
| O(7)#2-Ho(1)-O(6)#2 | 68.14(19)  | O(3)#1-Ho(1)-O(6)#2 | 126.9(2) |
| O(5)-Ho(1)-O(8)     | 67.36(19)  | O(5)-Ho(1)-O(6)#2   | 122.9(2) |
| O(5)-Ho(1)-O(4)#1   | 129.7(2)   | O(5)-Ho(1)-O(3)#1   | 88.9(2)  |
| O(5)-Ho(1)-O(7)#2   | 69.8(2)    | O(2)#3-Ho(1)-O(8)   | 81.3(2)  |

#1  $1-x, 1-y, 1-z$ ; #2  $+x, 3/2-y, 1/2+z$ ; #3  $2-x, 1-y, 1-z$ ; #4  $+x, 3/2-y, -1/2+z$
